# Supplementary material
Source: PubMed Central journal article supplement (PMC7832459)
Supplement: mmc1.pdf [file mmc1.pdf]

# THE LANCET

## Global Health

### Supplementary appendix

This appendix formed part of the original submission and has been peer reviewed.  
We post it as supplied by the authors.

Supplement to: Taylor MM, Kobeissi L, Kim C, et al. Inclusion of pregnant women in COVID-19 treatment trials: a review and global call to action. *Lancet Glob Health* 2020; published online Dec 16. [http://dx.doi.org/10.1016/S2214-109X\(20\)30484-8](http://dx.doi.org/10.1016/S2214-109X(20)30484-8).

**Supplemental Methods/Results 1:**

**Assessment of entry of clinical trials of COVID-19 treatment into more than one clinical trial registry**

In order to assess the possible entry of clinical trials of treatment for COVID-19 in more than one clinical trial registry, we reviewed 100 clinical trial entries in the clinical trial registry with the largest number of registered clinical trials, [www.clinicaltrials.gov](http://www.clinicaltrials.gov).

We conducted a review of 108 of the eligible non-US-based clinical trials of COVID-19 treatment registered in [www.clinicaltrials.gov](http://www.clinicaltrials.gov). We assumed that duplicate entries of COVID-19 treatment clinical trials could have occurred in [www.clinicaltrials.gov](http://www.clinicaltrials.gov) for two reasons: (1) this clinical trial registry contained hundreds more registered COVID-19 clinical trials than the next closest trial registry by frequency (Supplemental Table 1); (2) Non-US-based clinical trials are frequently registered in [www.clinicaltrials.gov](http://www.clinicaltrials.gov) from countries from all regions, many of these regions also have nationally-based clinical trial registries.

Using the Excel spreadsheets created for the 10 focused registry search, we performed a trial-by-trial title review of 108 clinical trials of COVID-19 treatment by selecting key treatment terms in the title or using title phrases from [www.clinicaltrials.gov](http://www.clinicaltrials.gov). We then searched for these key terms in the country-based trial registries for China, UK, Brazil, India, and European countries. These trials were eligible and included in this study and were non-randomly selected from the spreadsheet containing all trials reviewed in [www.clinicaltrials.gov](http://www.clinicaltrials.gov). The frequencies of this review from [www.clinicaltrials.gov](http://www.clinicaltrials.gov) to the country-based registry are noted below. Among these 108 clinical trials we found partial matches of title and content in another registry for 3 trials from France and 2 trials from Iran. We note that the trial registrations of these 5 trials were not exact duplicates within the two registries thus we cannot be certain of duplicate registration. From subsample cross registry search, we estimate that there is less than 5% duplicate registration of trials and that possible duplicate registration is not different by exclusion of pregnant women.

**Table: Frequency of partial title match within two trial registries (n = 108)**

| <b>Country of registration in <a href="http://www.clinicaltrials.gov">www.clinicaltrials.gov</a></b> | <b>Name of trial registry cross-searched</b> | <b>Number of trials cross searched in national registry</b> | <b>Number of partial matches indicating possible duplicate registration</b> |
|------------------------------------------------------------------------------------------------------|----------------------------------------------|-------------------------------------------------------------|-----------------------------------------------------------------------------|
| Brazil                                                                                               | ReBec                                        | 11                                                          | 0                                                                           |
| China                                                                                                | ChiCTR                                       | 13                                                          | 0                                                                           |
| European Countries                                                                                   |                                              |                                                             |                                                                             |
| <i>Austria</i>                                                                                       | EU-CTR                                       | 2                                                           | 0                                                                           |
| <i>Belgium</i>                                                                                       | EU-CTR                                       | 4                                                           | 0                                                                           |
| <i>Denmark</i>                                                                                       | EU-CTR                                       | 3                                                           | 0                                                                           |
| <i>France</i>                                                                                        | EU-CTR                                       | 18                                                          | 3                                                                           |
| <i>Germany</i>                                                                                       | EU-CTR                                       | 1                                                           | 0                                                                           |

**Appendix: Inclusion of pregnant women in COVID-19 treatment trials: a review and global call to action (Taylor M, Kobeissi L, et al)**

|                    |        |            |                 |
|--------------------|--------|------------|-----------------|
| <i>Greece</i>      | EU-CTR | 4          | 0               |
| <i>Netherlands</i> | EU-CTR | 1          | 0               |
| <i>Italy</i>       | EU-CTR | 11         | 0               |
| <i>Spain</i>       | EU-CTR | 11         | 0               |
| <i>Sweden</i>      | EU-CTR | 2          | 0               |
| <i>Switzerland</i> | EU-CTR | 1          | 0               |
| India              | CTRI   | 3          | 0               |
| Iran               | IRCT   | 13         | 2               |
| UK                 | ISRCTN | 7          | 0               |
| <b>Totals</b>      |        | <b>108</b> | <b>5 (4.6%)</b> |

**Appendix: Inclusion of pregnant women in COVID-19 treatment trials: a review and global call to action (Taylor M, Kobeissi L, et al)**

| <b>Supplemental Table 1: Registered trials with “COVID” in the title from 21 WHO and ICMJE-accepted clinical trials registries</b> |                                                      |                                                                                           |                                                      |                                                                                           |
|------------------------------------------------------------------------------------------------------------------------------------|------------------------------------------------------|-------------------------------------------------------------------------------------------|------------------------------------------------------|-------------------------------------------------------------------------------------------|
|                                                                                                                                    | <b>Time 1 (April 2020)</b>                           |                                                                                           | <b>Time 2 (July 2020)</b>                            |                                                                                           |
| <b>Clinical Trial Registry</b>                                                                                                     | <b>Number of clinical trials with COVID in title</b> | <b>Number of registered clinical trials with COVID and pregnant or pregnancy in title</b> | <b>Number of clinical trials with COVID in title</b> | <b>Number of registered clinical trials with COVID and pregnant or pregnancy in title</b> |
| Australia and New Zealand's (ANZCTR)                                                                                               | 15                                                   | 1                                                                                         | 91                                                   | 5                                                                                         |
| Brazilian Clinical Trials Registry (ReBec)                                                                                         | 4                                                    | 0                                                                                         | 30                                                   | 0                                                                                         |
| Chinese Clinical Trial Registry (ChiCTR)                                                                                           | 575                                                  | 0                                                                                         | 711                                                  | 0                                                                                         |
| Clinical Research Information Service (CRiS), Korea                                                                                | 0                                                    | 0                                                                                         | 4                                                    | 0                                                                                         |
| Clinical Trials Registry - India (CTRI)                                                                                            | 7                                                    | 0                                                                                         | 298                                                  | 0                                                                                         |
| Cuban Public Registry of Clinical Trials (RPCEC)                                                                                   | 0                                                    | 0                                                                                         | 36                                                   | 0                                                                                         |
| EU Clinical Trials Register (EU-CTR)                                                                                               | 53                                                   | 0                                                                                         | 273                                                  | 1                                                                                         |
| German Clinical Trials Register (DRKS)                                                                                             | Not accessible                                       | N/A                                                                                       | 465                                                  | 0                                                                                         |
| Iranian Registry of Clinical Trials (IRCT)                                                                                         | 72                                                   | 0                                                                                         | 281                                                  | 0                                                                                         |

**Appendix: Inclusion of pregnant women in COVID-19 treatment trials: a review and global call to action (Taylor M, Kobeissi L, et al)**

|                                                 |             |          |              |           |
|-------------------------------------------------|-------------|----------|--------------|-----------|
| Japan Primary Registries Network                | 0           | 0        | 0            | 0         |
| The Netherlands Trial Register                  | 15          | 1        | 432          | 2         |
| Pan African Clinical Trial Registry (PACTR)     | 1           | 0        | 19           | 0         |
| Peruvian Registry of Clinical Trials            | 0           | 0        | 0            | 0         |
| Philippine Health Research Registry             | 0           | 0        | 6            | 1         |
| Sri Lanka Clinical Trials Registry (SLCTR)      | 0           | 0        | 1            | 0         |
| South African National Clinical Trials Register | 0           | 0        | 0            | 0         |
| Swiss FOPH Human Research Projects              | 4           | 0        | 23           | 0         |
| Tanzania Clinical Trial Registry                | 0           | 0        | 0            | 0         |
| Thai Clinical Trials Registry                   | 0           | 0        | 20           | 0         |
| The United Kingdoms' ISRCTN registry            | 9           | 1        | 86           | 3         |
| The United States' ClinicalTrials.gov           | 366         | 3        | 2713         | 25        |
| <b>Total</b>                                    | <b>1121</b> | <b>6</b> | <b>5,492</b> | <b>40</b> |

**Appendix: Inclusion of pregnant women in COVID-19 treatment trials: a review and global call to action (Taylor M, Kobeissi L, et al)**

| <b>Supplemental Table 2a: Registered trials evaluating coronavirus in pregnant women, April 7–10, 2020</b>                      |                |                            |                       |                                                                                                                                                                                                                               |
|---------------------------------------------------------------------------------------------------------------------------------|----------------|----------------------------|-----------------------|-------------------------------------------------------------------------------------------------------------------------------------------------------------------------------------------------------------------------------|
| <b>Trial Name</b>                                                                                                               | <b>Country</b> | <b>Design</b>              | <b>Trial registry</b> | <b>Trial registry link</b>                                                                                                                                                                                                    |
| Prospective registry of maternal, perinatal and neonatal outcomes from pregnancies infected with SARS-COV2 (COVID-19)           | Australia      | Prospective Observational  | ANZCTR                | <a href="http://www.anzctr.org.au/Trial/Registration/TrialReview.aspx?id=379572&amp;isReview=true">http://www.anzctr.org.au/Trial/Registration/TrialReview.aspx?id=379572&amp;isReview=true</a>                               |
| COVID-19 PRIORITY (Pregnancy CoRonavirus Outcomes RegIsTrY) (PRIORITY)                                                          | USA            | Observational Registry     | clinicaltrials.gov    | <a href="https://www.clinicaltrials.gov/ct2/show/NCT04323839?term=pregnancy&amp;cond=covid&amp;draw=2&amp;rank=1">https://www.clinicaltrials.gov/ct2/show/NCT04323839?term=pregnancy&amp;cond=covid&amp;draw=2&amp;rank=1</a> |
| Clinical Characteristics of Coronavirus Disease 2019 (COVID-19) in Pregnancy                                                    | Italy          | Observational Registry     | clinicaltrials.gov    | <a href="https://www.clinicaltrials.gov/ct2/show/NCT04319016?term=pregnancy&amp;cond=covid&amp;draw=2&amp;rank=3">https://www.clinicaltrials.gov/ct2/show/NCT04319016?term=pregnancy&amp;cond=covid&amp;draw=2&amp;rank=3</a> |
| Clinical Characteristics of Coronavirus Disease 2019 (COVID-19) in Pregnancy: The Italian Registry on Coronavirus in Pregnancy. | Italy          | Observational Registry     | clinicaltrials.gov    | <a href="https://www.clinicaltrials.gov/ct2/show/NCT04315870?term=pregnancy&amp;cond=covid&amp;draw=2&amp;rank=4">https://www.clinicaltrials.gov/ct2/show/NCT04315870?term=pregnancy&amp;cond=covid&amp;draw=2&amp;rank=4</a> |
| UKOSS: Pandemic COVID-19 in pregnancy, COVID-19 (SARS-CoV-2 infection) in pregnant women Pregnancy and Childbirth               | UK             | Observational cohort study | ISRCTN40092247        | <a href="http://www.isrctn.com/ISRCTN40092247">http://www.isrctn.com/ISRCTN40092247</a>                                                                                                                                       |
| COVID-19 during pregnancy: a prospective observational cohort                                                                   | Netherlands    | Observational cohort study | Trial NL8485          | <a href="https://www.trialregister.nl/trial/8485">https://www.trialregister.nl/trial/8485</a>                                                                                                                                 |

**Appendix: Inclusion of pregnant women in COVID-19 treatment trials: a review and global call to action (Taylor M, Kobeissi L, et al)**

| <b>Supplementary Table 2b: Registered trials evaluating COVID-19 in pregnant women as of July 10–15, 2020</b>                                                                       |                |                                 |                       |                                                                                                                                                                                                               |
|-------------------------------------------------------------------------------------------------------------------------------------------------------------------------------------|----------------|---------------------------------|-----------------------|---------------------------------------------------------------------------------------------------------------------------------------------------------------------------------------------------------------|
| <b>Trial Name</b>                                                                                                                                                                   | <b>Country</b> | <b>Design</b>                   | <b>Trial registry</b> | <b>Trial registry link</b>                                                                                                                                                                                    |
| Prospective registry of maternal, perinatal and neonatal outcomes from pregnancies infected with SARS-COV2 (COVID-19)                                                               | Australia      | Prospective Observational       | ANZCTR                | <a href="http://www.anzctr.org.au/Trial/Registration/TrialReview.aspx?id=379572&amp;isReview=true">http://www.anzctr.org.au/Trial/Registration/TrialReview.aspx?id=379572&amp;isReview=true</a>               |
| Has the threat of SARS COVID-19 increased influenza vaccination rates in pregnant women?                                                                                            | Australia      | Cross-sectional study           | ANZCTR                | <a href="https://www.anzctr.org.au/Trial/Registration/TrialReview.aspx?id=379826&amp;isReview=true">https://www.anzctr.org.au/Trial/Registration/TrialReview.aspx?id=379826&amp;isReview=true</a>             |
| Simulation time taken amongst consultant anesthetists to perform spinal anesthesia or general anesthesia for COVID-19 patients requiring an emergency category 1 caesarean delivery | Australia      | Randomized Controlled trial     | ANZCTR                | <a href="https://www.anzctr.org.au/Trial/Registration/TrialReview.aspx?id=379818&amp;isReview=true">https://www.anzctr.org.au/Trial/Registration/TrialReview.aspx?id=379818&amp;isReview=true</a>             |
| Neonatal CoVID-19 Study to evaluate the population health impacts of COVID-19 in mothers and their newborn infants cared for in tertiary and non-tertiary hospitals in Australia.   | Australia      | Prospective Observational study | ANZCTR                | <a href="https://www.anzctr.org.au/Trial/Registration/TrialReview.aspx?id=379709&amp;isReview=true">https://www.anzctr.org.au/Trial/Registration/TrialReview.aspx?id=379709&amp;isReview=true</a>             |
| Risk Factors for Anxiety and Depression Among Pregnant Women During the COVID-19 Pandemic                                                                                           | Australia      | Prospective Observational study | ANZCTR                | <a href="https://www.anzctr.org.au/Trial/Registration/TrialReview.aspx?id=18862&amp;isClinicalTrial=True">https://www.anzctr.org.au/Trial/Registration/TrialReview.aspx?id=18862&amp;isClinicalTrial=True</a> |

**Appendix: Inclusion of pregnant women in COVID-19 treatment trials: a review and global call to action (Taylor M, Kobeissi L, et al)**

|                                                                                                               |     |                                  |                      |                                                                                                                                                                                                                                             |
|---------------------------------------------------------------------------------------------------------------|-----|----------------------------------|----------------------|---------------------------------------------------------------------------------------------------------------------------------------------------------------------------------------------------------------------------------------------|
| Hydroxychloroquine efficacy in preventing SARS-CoV-2 infection and CoVid-19 disease severity during pregnancy | EU  | Randomized Controlled trial      | 2020-001587-29/SPAIN | <a href="https://www.clinicaltrialsregister.eu/ctr-search/trial/2020-001587-29/ES">https://www.clinicaltrialsregister.eu/ctr-search/trial/2020-001587-29/ES</a>                                                                             |
| COVID-19 PRIORITY (Pregnancy CoRonavIrus Outcomes RegIsTrY) (PRIORITY)                                        | USA | Observational Registry           | clinicaltrials.gov   | <a href="https://www.clinicaltrials.gov/ct2/show/NCT04323839?term=pregnancy&amp;cond=covid&amp;draw=2&amp;rank=1">https://www.clinicaltrials.gov/ct2/show/NCT04323839?term=pregnancy&amp;cond=covid&amp;draw=2&amp;rank=1</a>               |
| International Registry of Coronavirus (COVID-19) Exposure in Pregnancy (IRCEP)                                | USA | Prospective Cohort               | clinicaltrials.gov   | <a href="https://clinicaltrials.gov/ct2/show/NCT04366986?cond=COVID+19+and+pregnancy&amp;cntry=US&amp;draw=2&amp;rank=2">https://clinicaltrials.gov/ct2/show/NCT04366986?cond=COVID+19+and+pregnancy&amp;cntry=US&amp;draw=2&amp;rank=2</a> |
| COVID-19 and Obstetric Transmission (COVIDOB)                                                                 | USA | Case-control Study (Prospective) | clinicaltrials.gov   | <a href="https://clinicaltrials.gov/ct2/show/NCT04418557?cond=COVID+19+and+pregnancy&amp;cntry=US&amp;draw=2&amp;rank=3">https://clinicaltrials.gov/ct2/show/NCT04418557?cond=COVID+19+and+pregnancy&amp;cntry=US&amp;draw=2&amp;rank=3</a> |
| Assessing the Safety of Pregnancy In the CoRonavirus (COVID-19) pandEmic (ASPIRE)                             | USA | Prospective Cohort               | clinicaltrials.gov   | <a href="https://clinicaltrials.gov/ct2/show/NCT04388605?cond=COVID+19+and+pregnancy&amp;cntry=US&amp;draw=2&amp;rank=4">https://clinicaltrials.gov/ct2/show/NCT04388605?cond=COVID+19+and+pregnancy&amp;cntry=US&amp;draw=2&amp;rank=4</a> |
| Health and Wellbeing of Pregnant and Post-Partum Women During the COVID-19 Pandemic                           | USA | Cross-sectional study            | clinicaltrials.gov   | <a href="https://clinicaltrials.gov/ct2/show/NCT04385238?cond=COVID+19+and+pregnancy&amp;cntry=US&amp;draw=2&amp;rank=5">https://clinicaltrials.gov/ct2/show/NCT04385238?cond=COVID+19+and+pregnancy&amp;cntry=US&amp;draw=2&amp;rank=5</a> |
| In-Utero Vascular Accidents in Neonates From COVID-19 Infected Mothers                                        | USA | Prospective Cohort               | clinicaltrials.gov   | <a href="https://clinicaltrials.gov/ct2/show/NCT04431869?cond=COVID+19+and+pregnancy&amp;cntry=US&amp;draw=2&amp;rank=6">https://clinicaltrials.gov/ct2/show/NCT04431869?cond=COVID+19+and+pregnancy&amp;cntry=US&amp;draw=2&amp;rank=6</a> |



**Appendix: Inclusion of pregnant women in COVID-19 treatment trials: a review and global call to action (Taylor M, Kobeissi L, et al)**

|                                                                                                                                            |                               |                                 |                    |                                                                                                                                                                                                                                             |
|--------------------------------------------------------------------------------------------------------------------------------------------|-------------------------------|---------------------------------|--------------------|---------------------------------------------------------------------------------------------------------------------------------------------------------------------------------------------------------------------------------------------|
| Risks of COVID19 in the Pregnant Population                                                                                                | USA                           | Observational Prospective Study | clinicaltrials.gov | <a href="https://clinicaltrials.gov/ct2/show/NCT04379284?cond=COVID+19+and+pregnancy&amp;cntry=US&amp;draw=2&amp;rank=7">https://clinicaltrials.gov/ct2/show/NCT04379284?cond=COVID+19+and+pregnancy&amp;cntry=US&amp;draw=2&amp;rank=7</a> |
| Risk Factors for Anxiety and Depression Among Pregnant Women During the COVID-19 Pandemic (MindCOVID)                                      | USA                           | Observational Prospective Study | clinicaltrials.gov | <a href="https://clinicaltrials.gov/ct2/show/NCT04377412?cond=COVID+19+and+pregnancy&amp;cntry=US&amp;draw=2&amp;rank=8">https://clinicaltrials.gov/ct2/show/NCT04377412?cond=COVID+19+and+pregnancy&amp;cntry=US&amp;draw=2&amp;rank=8</a> |
| Descriptive and Evaluation Study of the Use of Pulmonary Ultrasound in the Initial Management of Pregnant Women in the Context of COVID-19 | USA (Marseille, France)       | Cohort prospective study        | clinicaltrials.gov | <a href="https://www.clinicaltrials.gov/ct2/show/NCT04432805?cond=COVID-19+and+pregnant+women&amp;draw=2&amp;rank=1">https://www.clinicaltrials.gov/ct2/show/NCT04432805?cond=COVID-19+and+pregnant+women&amp;draw=2&amp;rank=1</a>         |
| Effect of Hydroxychloroquine in COVID                                                                                                      | USA                           | Randomized Controlled Trial     | clinicaltrials.gov | <a href="https://www.clinicaltrials.gov/ct2/show/NCT04354441?cond=COVID-19+and+pregnant+women&amp;draw=2&amp;rank=2">https://www.clinicaltrials.gov/ct2/show/NCT04354441?cond=COVID-19+and+pregnant+women&amp;draw=2&amp;rank=2</a>         |
| Postpartum Sexual Function in Pregnant Women With COVID-19                                                                                 | USA (Istanbul, Turkey)        | Observational Prospective Study | clinicaltrials.gov | <a href="https://www.clinicaltrials.gov/ct2/show/NCT04389489?cond=COVID-19+and+pregnant+women&amp;draw=2&amp;rank=3">https://www.clinicaltrials.gov/ct2/show/NCT04389489?cond=COVID-19+and+pregnant+women&amp;draw=2&amp;rank=3</a>         |
| Obstetric and Perinatal Outcomes of Women With COVID-19                                                                                    | USA (Marseille, Paca, France) | Prospective Observational Study | clinicaltrials.gov | <a href="https://www.clinicaltrials.gov/ct2/show/NCT04369859?cond=COVID-19+and+pregnant+women&amp;draw=2&amp;rank=4">https://www.clinicaltrials.gov/ct2/show/NCT04369859?cond=COVID-19+and+pregnant+women&amp;draw=2&amp;rank=4</a>         |
| Investigation of the Relationship Between New Coronary Virus Disease (COVID-19) and Anxiety and Depressive Symptoms in Pregnant Women"     | USA (Istanbul, Turkey)        | Case- Control Study             | clinicaltrials.gov | <a href="https://www.clinicaltrials.gov/ct2/show/NCT04384887?cond=COVID-19+and+pregnant+women&amp;draw=2&amp;rank=5">https://www.clinicaltrials.gov/ct2/show/NCT04384887?cond=COVID-19+and+pregnant+women&amp;draw=2&amp;rank=5</a>         |

**Appendix: Inclusion of pregnant women in COVID-19 treatment trials: a review and global call to action (Taylor M, Kobeissi L, et al)**

|                                                                                                              |                            |                                 |                    |                                                                                                                                                                                                                                       |
|--------------------------------------------------------------------------------------------------------------|----------------------------|---------------------------------|--------------------|---------------------------------------------------------------------------------------------------------------------------------------------------------------------------------------------------------------------------------------|
| Physical Activity Level, Stress Level, Sleep Quality in Pregnant Women During Covid-19 Quarantine            | USA<br>(Istanbul, Turkey)  | Prospective Observational Study | clinicaltrials.gov | <a href="https://www.clinicaltrials.gov/ct2/show/NCT04336787?cond=COVID-19+and+pregnant+women&amp;drow=2&amp;rank=6">https://www.clinicaltrials.gov/ct2/show/NCT04336787?cond=COVID-19+and+pregnant+women&amp;drow=2&amp;rank=6</a>   |
| Characteristics of COVID-19 Infection Among PREGnant Women                                                   | USA                        | Prospective Cohort Study        | clinicaltrials.gov | <a href="https://www.clinicaltrials.gov/ct2/show/NCT04398264?cond=COVID-19+and+pregnant+women&amp;drow=2&amp;rank=7">https://www.clinicaltrials.gov/ct2/show/NCT04398264?cond=COVID-19+and+pregnant+women&amp;drow=2&amp;rank=7</a>   |
| Evaluation of the Relationship Between Zinc Vitamin D and b12 Levels in the Covid-19 Positive Pregnant Women | USA<br>(Istanbul, Turkey)  | Case-Control Study              | clinicaltrials.gov | <a href="https://www.clinicaltrials.gov/ct2/show/NCT04407572?cond=COVID-19+and+pregnant+women&amp;drow=2&amp;rank=8">https://www.clinicaltrials.gov/ct2/show/NCT04407572?cond=COVID-19+and+pregnant+women&amp;drow=2&amp;rank=8</a>   |
| Prevalence and Impact of COVID-19 Infection in Pregnant Women, Foetuses and New-borns                        | USA                        | Prospective Cohort Study        | clinicaltrials.gov | <a href="https://www.clinicaltrials.gov/ct2/show/NCT04355234?cond=COVID-19+and+pregnant+women&amp;drow=2&amp;rank=9">https://www.clinicaltrials.gov/ct2/show/NCT04355234?cond=COVID-19+and+pregnant+women&amp;drow=2&amp;rank=9</a>   |
| Knowledge About Covid-19 Infection in Pregnant Women                                                         | USA (Giza, Egypt)          | Cross-sectional study           | clinicaltrials.gov | <a href="https://www.clinicaltrials.gov/ct2/show/NCT04423692?cond=COVID-19+and+pregnant+women&amp;drow=3&amp;rank=11">https://www.clinicaltrials.gov/ct2/show/NCT04423692?cond=COVID-19+and+pregnant+women&amp;drow=3&amp;rank=11</a> |
| D-dimer Levels in Pregnant With COVID-19                                                                     | USA<br>(Istanbul, Turkey)  | Case-Control Study              | clinicaltrials.gov | <a href="https://www.clinicaltrials.gov/ct2/show/NCT04389554?cond=COVID-19+and+pregnant+women&amp;drow=3&amp;rank=12">https://www.clinicaltrials.gov/ct2/show/NCT04389554?cond=COVID-19+and+pregnant+women&amp;drow=3&amp;rank=12</a> |
| Hydroxychloroquine Azithromycin COVID-19 Pregnancy Trial (HASCOPT)                                           | USA<br>(Marseille, France) | Randomized Controlled Trial     | clinicaltrials.gov | <a href="https://www.clinicaltrials.gov/ct2/show/NCT04365231?cond=COVID-19+and+pregnant+women&amp;drow=3&amp;rank=13">https://www.clinicaltrials.gov/ct2/show/NCT04365231?cond=COVID-19+and+pregnant+women&amp;drow=3&amp;rank=13</a> |

**Appendix: Inclusion of pregnant women in COVID-19 treatment trials: a review and global call to action (Taylor M, Kobeissi L, et al)**

|                                                                                                                                      |                              |                                        |                    |                                                                                                                                                                                                                                                 |
|--------------------------------------------------------------------------------------------------------------------------------------|------------------------------|----------------------------------------|--------------------|-------------------------------------------------------------------------------------------------------------------------------------------------------------------------------------------------------------------------------------------------|
| Prognosis in Pregnant With COVID-19                                                                                                  | USA<br>(Istanbul,<br>Turkey) | Observational Study<br>(Retrospective) | clinicaltrials.gov | <a href="https://www.clinicaltrials.gov/ct2/show/NCT04409249?cond=COVID-19+and+pregnant+women&amp;draw=2&amp;rank=14">https://www.clinicaltrials.gov/ct2/show/NCT04409249?cond=COVID-19+and+pregnant+women&amp;draw=2&amp;rank=14</a>           |
| Postoperative Recovery Index, Patient Expectations and Satisfaction With Prenatal Care Instrument in Pregnant Patients With COVID-19 | USA<br>(Istanbul,<br>Turkey) | Prospective Study<br>Observational     | clinicaltrials.gov | <a href="https://www.clinicaltrials.gov/ct2/show/NCT04389515?cond=COVID-19+and+pregnant+women&amp;draw=2&amp;rank=15">https://www.clinicaltrials.gov/ct2/show/NCT04389515?cond=COVID-19+and+pregnant+women&amp;draw=2&amp;rank=15</a>           |
| Clinical and Immunologic Impact of Perinatal SARS-CoV-2 (COVID-19) Infection                                                         | USA                          | Case-control study                     | clinicaltrials.gov | <a href="https://www.clinicaltrials.gov/ct2/show/NCT04362956?cond=COVID-19+and+pregnant+women&amp;draw=2&amp;rank=16">https://www.clinicaltrials.gov/ct2/show/NCT04362956?cond=COVID-19+and+pregnant+women&amp;draw=2&amp;rank=16</a>           |
| Assessment of Obstetric, Fetal and Neonatal Risks and Vertical SARS-CoV-2 Transmission During COVID-19 Pandemic (COroFet)            | USA<br>(Toulouse,<br>France) | Clinical Trial (Non<br>randomized)     | clinicaltrials.gov | <a href="https://www.clinicaltrials.gov/ct2/show/NCT04360811?cond=COVID-19+and+pregnant+women&amp;draw=2&amp;rank=17">https://www.clinicaltrials.gov/ct2/show/NCT04360811?cond=COVID-19+and+pregnant+women&amp;draw=2&amp;rank=17</a>           |
| Northeast COVID-19 and Pregnancy Study Group (NCOVIP)                                                                                | USA<br>(Recife,<br>Brazil)   | Prospective Cohort study               | clinicaltrials.gov | <a href="https://www.clinicaltrials.gov/ct2/show/NCT04462367?cond=Corona+virus+2+and+pregnant+women&amp;draw=2&amp;rank=2">https://www.clinicaltrials.gov/ct2/show/NCT04462367?cond=Corona+virus+2+and+pregnant+women&amp;draw=2&amp;rank=2</a> |
| Clinical Characteristics of Coronavirus Disease 2019 (COVID-19) in Pregnancy                                                         | Italy                        | Observational Registry                 | clinicaltrials.gov | <a href="https://www.clinicaltrials.gov/ct2/show/NCT04319016?term=pregnancy&amp;cond=covid&amp;draw=2&amp;rank=3">https://www.clinicaltrials.gov/ct2/show/NCT04319016?term=pregnancy&amp;cond=covid&amp;draw=2&amp;rank=3</a>                   |

**Appendix: Inclusion of pregnant women in COVID-19 treatment trials: a review and global call to action (Taylor M, Kobeissi L, et al)**

|                                                                                                                                 |       |                                   |                    |                                                                                                                                                                                                                                             |
|---------------------------------------------------------------------------------------------------------------------------------|-------|-----------------------------------|--------------------|---------------------------------------------------------------------------------------------------------------------------------------------------------------------------------------------------------------------------------------------|
| Clinical Characteristics of Coronavirus Disease 2019 (COVID-19) in Pregnancy: The Italian Registry on Coronavirus in Pregnancy. | Italy | Observational Registry            | clinicaltrials.gov | <a href="https://www.clinicaltrials.gov/ct2/show/NCT04315870?term=pregnancy&amp;cond=covid&amp;draw=2&amp;rank=4">https://www.clinicaltrials.gov/ct2/show/NCT04315870?term=pregnancy&amp;cond=covid&amp;draw=2&amp;rank=4</a>               |
| Risk Factors for Anxiety and Depression Among Pregnant Women During the COVID-19 Pandemic                                       | Italy | Prospective Cross-sectional study | clinicaltrials.gov | <a href="https://clinicaltrials.gov/ct2/show/NCT04377412?cond=COVID+19+and+pregnancy&amp;cntry=IT&amp;draw=2&amp;rank=3">https://clinicaltrials.gov/ct2/show/NCT04377412?cond=COVID+19+and+pregnancy&amp;cntry=IT&amp;draw=2&amp;rank=3</a> |
| A Prospective International Lung UltraSound Analysis (ILUSA) Study in Tertiary Maternity Wards During the SARS-CoV-2 Pandemic   | Italy | Prospective Cohort Study          | clinicaltrials.gov | <a href="https://www.anzctr.org.au/Trial/Registration/TrialReview.aspx?id=18598&amp;isClinicalTrial=True">https://www.anzctr.org.au/Trial/Registration/TrialReview.aspx?id=18598&amp;isClinicalTrial=True</a>                               |
| UKOSS: Pandemic COVID-19 in pregnancy, COVID-19 (SARS-CoV-2 infection) in pregnant women Pregnancy and Childbirth               | UK    | Observational cohort study        | ISRCTN40092247     | <a href="http://www.isrctn.com/ISRCTN40092247">http://www.isrctn.com/ISRCTN40092247</a>                                                                                                                                                     |

**Appendix: Inclusion of pregnant women in COVID-19 treatment trials: a review and global call to action (Taylor M, Kobeissi L, et al)**

|                                                                                                                                                                                                                                             |             |                                 |                   |                                                                                                                                                                                                                                                                                                                                                                                               |
|---------------------------------------------------------------------------------------------------------------------------------------------------------------------------------------------------------------------------------------------|-------------|---------------------------------|-------------------|-----------------------------------------------------------------------------------------------------------------------------------------------------------------------------------------------------------------------------------------------------------------------------------------------------------------------------------------------------------------------------------------------|
| ISRCTN93266696 : Studying the immune response and long-term morbidity of COVID-19 infection in pregnancy                                                                                                                                    | UK          | Prospective Study               | ISRCTN93266696    | <a href="https://doi.org/10.1186/ISRCTN93266696">https://doi.org/10.1186/ISRCTN93266696</a>                                                                                                                                                                                                                                                                                                   |
| ISRCTN68026880 : A global registry of women affected by COVID-19 in pregnancy and their babies, to guide treatment and prevention                                                                                                           | UK          | Retrospective Study             | ISRCTN68026880    | <a href="http://www.isrctn.com/ISRCTN68026880?q=COVID-19%20and%20pregnant%20women&amp;filters=&amp;sort=&amp;offset=7&amp;totalResults=10&amp;page=1&amp;pageSize=10&amp;searchType=basic-search">http://www.isrctn.com/ISRCTN68026880?q=COVID-19%20and%20pregnant%20women&amp;filters=&amp;sort=&amp;offset=7&amp;totalResults=10&amp;page=1&amp;pageSize=10&amp;searchType=basic-search</a> |
| COVID-19 during pregnancy: a prospective observational cohort                                                                                                                                                                               | Netherlands | Observational cohort study      | Trial NL8485      | <a href="https://www.trialregister.nl/trial/8485">https://www.trialregister.nl/trial/8485</a>                                                                                                                                                                                                                                                                                                 |
| Lifestyle of pregnant women during COVID-19 pandemic                                                                                                                                                                                        | Netherlands | Observational Study             | Trial NL8668      | <a href="https://www.trialregister.nl/trial/8668">https://www.trialregister.nl/trial/8668</a>                                                                                                                                                                                                                                                                                                 |
| Knowledge, practices, and risk and susceptibility perceptions on exposure to COVID-19: A qualitative triangulation study on pregnant women, their spouses, and non-pregnant reproductive-aged women with healthcare workers in Metro Manila | Philippines | Mixed-methods descriptive study | PHRR200604-002695 | <a href="http://www.registry.healthresearch.ph/index.php/registry?view=research&amp;layout=details&amp;cid=2695">http://www.registry.healthresearch.ph/index.php/registry?view=research&amp;layout=details&amp;cid=2695</a>                                                                                                                                                                   |

**Appendix: Inclusion of pregnant women in COVID-19 treatment trials: a review and global call to action (Taylor M, Kobeissi L, et al)**

| <b>Supplemental Table 3: Exclusion of pregnant women from clinical trials of COVID-19 treatment using vitamins A, B-complex, C, D, and E.</b> |                             |                                                |
|-----------------------------------------------------------------------------------------------------------------------------------------------|-----------------------------|------------------------------------------------|
| <b>Trial Registry</b>                                                                                                                         | <b>Vitamin Trials Total</b> | <b>Vitamin Trials Excluding Pregnant women</b> |
| The United Kingdoms' ISRCTN registry                                                                                                          | 0                           | 0                                              |
| Brazilian Clinical Trials Registry (ReBec)                                                                                                    | 0                           | 0                                              |
| The United States' ClinicalTrials.gov                                                                                                         | 15                          | 12                                             |
| Clinical Trials Registry - India (CTRI)                                                                                                       | 0                           | 0                                              |
| Australia and New Zealand's (ANZCTR)                                                                                                          | 1                           | 0                                              |
| Chinese Clinical Trial Registry (ChiCTR)                                                                                                      | 3                           | 3                                              |
| EU Clinical Trials Register (EU-CTR)                                                                                                          | 0                           | 0                                              |
| Iranian Registry of Clinical Trials (IRCT)                                                                                                    | 16                          | 12                                             |
| The Netherlands Trial Register                                                                                                                | 0                           | 0                                              |
| Swiss FOPH Human Research Projects                                                                                                            | 0                           | 0                                              |
| <b>Totals</b>                                                                                                                                 | <b>35</b>                   | <b>27</b>                                      |
